# Supplementary material
Source: publisher site journal article supplement (https://www.spandidos-publications.com/5167/downloadSupplementary)

Figure S1. Correlation analysis of peripheral lymphocyte count and serum albumin concentration in (A) healthy controls and (B) patients with lung cancer.

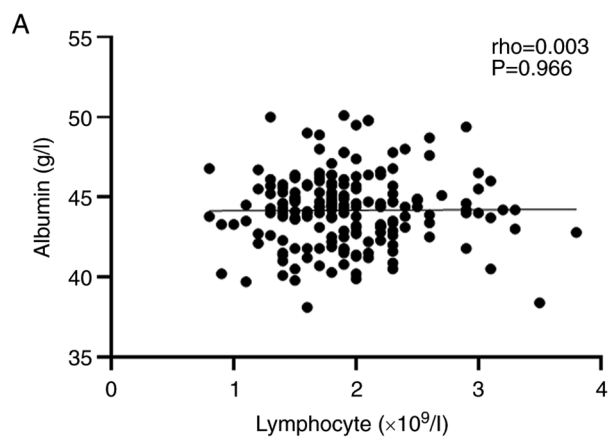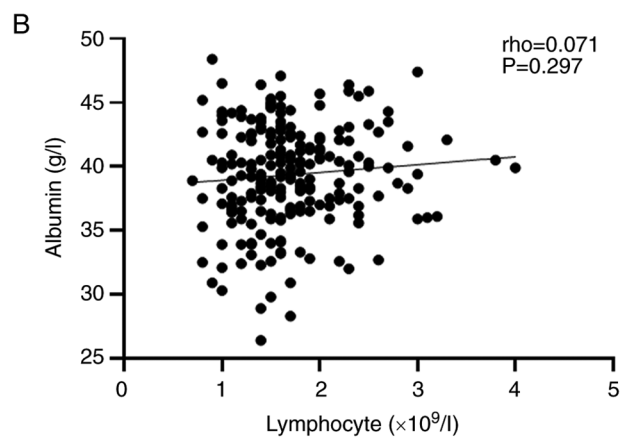

Supplement: Supplementary file 1 [file downloadSupplementary]
